# Supplementary material for: Bio-Computational Evaluation of Compounds of Bacopa Monnieri as a Potential Treatment for Schizophrenia
Source: MDPI journal article supplement (doi:10.3390/molecules27207050), 2022-10-19
Supplement: s1 [file s1]

Table S1: List of Neurorelese Cycle Genes Extracted from Reactome Database

| <b>MoleculeType</b> | <b>Identifier</b> | <b>MoleculeName</b>     |
|---------------------|-------------------|-------------------------|
| Proteins            | P61764-1          | UniProt:P61764-1 STXBP1 |
| Proteins            | O14810            | UniProt:O14810 CPLX1    |
| Proteins            | Q86UR5            | UniProt:Q86UR5 RIMS1    |
| Proteins            | P60880            | UniProt:P60880 SNAP25   |
| Proteins            | Q9H598            | UniProt:Q9H598 SLC32A1  |
| Proteins            | P20336            | UniProt:P20336 RAB3A    |
| Proteins            | P21579            | UniProt:P21579 SYT1     |
| Proteins            | Q05329            | UniProt:Q05329 GAD2     |
| Proteins            | Q99259            | UniProt:Q99259 GAD1     |
| Proteins            | P63027            | UniProt:P63027 VAMP2    |
| Proteins            | P11142            | UniProt:P11142 HSPA8    |
| Proteins            | Q9H3Z4            | UniProt:Q9H3Z4 DNAJC5   |
| Proteins            | Q16623            | UniProt:Q16623 STX1A    |
| Proteins            | P51649            | UniProt:P51649 ALDH5A1  |
| Proteins            | P80404            | UniProt:P80404 ABAT     |
| Proteins            | Q9NSD5            | UniProt:Q9NSD5 SLC6A13  |
| Proteins            | P48066            | UniProt:P48066 SLC6A11  |
| Proteins            | P30531            | UniProt:P30531 SLC6A1   |
| Proteins            | P48065            | UniProt:P48065 SLC6A12  |
| Proteins            | O15245            | UniProt:O15245 SLC22A1  |
| Proteins            | O15244            | UniProt:O15244 SLC22A2  |
| Proteins            | O95153            | UniProt:O95153 TSPOAP1  |
| Proteins            | O14795            | UniProt:O14795 UNC13B   |
| Proteins            | O75334            | UniProt:O75334 PPFIA2   |
| Proteins            | O75335            | UniProt:O75335 PPFIA4   |
| Proteins            | O75145            | UniProt:O75145 PPFIA3   |
| Proteins            | Q13136            | UniProt:Q13136 PPFIA1   |
| Proteins            | Q05940            | UniProt:Q05940 SLC18A2  |
| Proteins            | P21397            | UniProt:P21397 MAOA     |
| Proteins            | Q16572            | UniProt:Q16572 SLC18A3  |
| Proteins            | P28329            | UniProt:P28329 CHAT     |
| Proteins            | Q9GZV3            | UniProt:Q9GZV3 SLC5A7   |
| Proteins            | P17600            | UniProt:P17600 SYN1     |
| Proteins            | Q92777            | UniProt:Q92777 SYN2     |
| Proteins            | O14994            | UniProt:O14994 SYN3     |
| Proteins            | O94925            | UniProt:O94925 GLS      |
| Proteins            | Q9UI32            | UniProt:Q9UI32 GLS2     |
| Proteins            | Q96QD8            | UniProt:Q96QD8 SLC38A2  |
| Proteins            | P48664            | UniProt:P48664 SLC1A6   |
| Proteins            | P43004            | UniProt:P43004 SLC1A2   |
| Proteins            | P43003            | UniProt:P43003 SLC1A3   |
| Proteins            | P43005            | UniProt:P43005 SLC1A1   |
| Proteins            | O00341            | UniProt:O00341 SLC1A7   |
| Proteins            | O75915            | UniProt:O75915 ARL6IP5  |
| Proteins            | Q9P2U7            | UniProt:Q9P2U7 SLC17A7  |
| Proteins            | Q02410            | UniProt:Q02410 APBA1    |
| Proteins            | O14936            | UniProt:O14936 CASK     |
| Proteins            | O14910            | UniProt:O14910 LIN7A    |
| Proteins            | Q9HAP6            | UniProt:Q9HAP6 LIN7B    |
| Proteins            | Q9NUP9            | UniProt:Q9NUP9 LIN7C    |

Proteins

Q02083

UniProt:Q02083 NAAA
