# Supplementary material for: Bio-Computational Evaluation of Compounds of Bacopa Monnieri as a Potential Treatment for Schizophrenia
Source: MDPI journal article supplement (doi:10.3390/molecules27207050), 2022-10-19
Supplement: s1 [file s1]

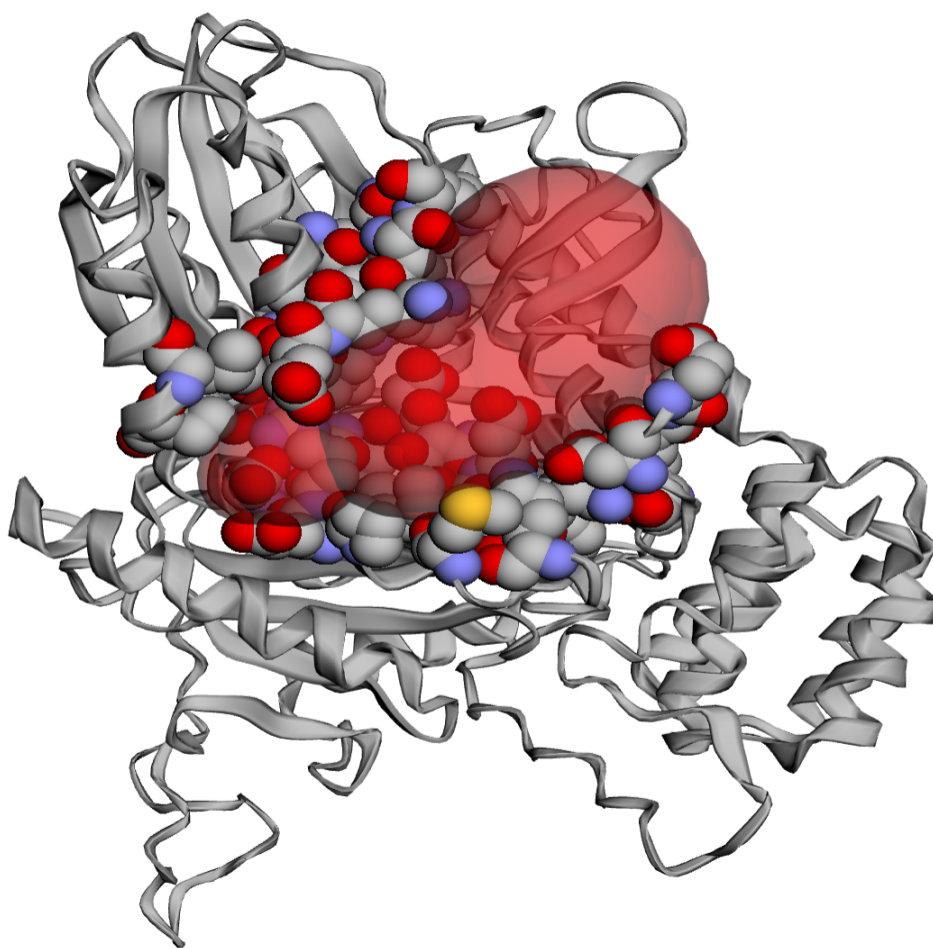

Figure S1: Depicting the 3D visualization of predicted active site (in red sphere) key residues are shown by sphere pattern. STXBP1 shown by grey color in ribbon pattern.
