# Supplementary material for: Bio-Computational Evaluation of Compounds of Bacopa Monnieri as a Potential Treatment for Schizophrenia
Source: MDPI journal article supplement (doi:10.3390/molecules27207050), 2022-10-19
Supplement: s1 [file s1]

Table S2: physicochemical qualities assessment of Bacopa natural compounded. Data obtained

| Molecule Name | UNIQUE_SMILES                                                        | USER_SUPPLIED_SMILES                              |
|---------------|----------------------------------------------------------------------|---------------------------------------------------|
| C7H8O2        | <chem>OCc1ccc(O)cc1</chem>                                           | <chem>C1=CC(=CC=C1CO)O</chem>                     |
| C7H6O3        | <chem>[OH2+].c1ccc(cc1)C([O-])=</chem>                               | <chem>C1=CC(=CC=C1C(=O)[O-])[OH2+]</chem>         |
| C11H16O3      | <chem>CC1(C)C[C@H](O)C[C@@](C[C@@]12C[C@H](CC(C1=CC(=O)O2))(C</chem> |                                                   |
| C11H12O4      | <chem>COc1ccc(C=CC(O)=O)cc1C</chem>                                  | <chem>COC1=C(C=C(C=C1)C=CC(=O)O)OC</chem>         |
| C11H12O4      | <chem>COc1ccc(\C=C\C(O)=O)cc:</chem>                                 | <chem>COC1=C(C=C(C=C1)/C=C/C(=O)O)OC</chem>       |
| C15H10O5      | <chem>Oc1ccc(cc1)C2=CC(=O)c3</chem>                                  | <chem>C1=CC(=CC=C1C2=CC(=O)C3=C(C=C(C=C</chem>    |
| C15H10O6      | <chem>Oc1cc(O)c2C(=O)C=C(Oc2</chem>                                  | <chem>C1=CC(=C(C=C1C2=CC(=O)C3=C(C=C(C=C</chem>   |
| C14H26O6      | <chem>CCCCC[C@H](O)[C@@H]</chem>                                     | <chem>CCCCC[C@H](C=C)O[C@H]1[C@@H]([C</chem>      |
| C14H26O6      | <chem>CCCCCCC(OC1OC(CO)C(O)C</chem>                                  | <chem>CCCCCCC(C=C)OC1C(C(C(C(O1)CO)O)O)O</chem>   |
| C15H10O7      | <chem>Oc1cc(O)c2C(=O)C=C(Oc:</chem>                                  | <chem>C1=CC(=C(C=C1C2=C(C(=O)C3=C(C=C(C=</chem>   |
| C14H20O8      | <chem>OC[C@H]1O[C@@H](OC</chem>                                      | <chem>C1=CC(=C(C=C1CCO[C@H]2[C@@H]([C</chem>      |
| C14H20O8      | <chem>OCC1OC(OCCc2ccc(O)c(O</chem>                                   | <chem>C1=CC(=C(C=C1CCOC2C(C(C(O2)CO)O</chem>      |
| C16H20O9      | <chem>COc1cc(\C=C\C(O)=O)[C@</chem>                                  | <chem>COC1=C(C=CC(=C1)/C=C/C(=O)O[C@H]2[</chem>   |
| C14H26O9S     | <chem>CCCCC[C@H](O)[C@@H]</chem>                                     | <chem>CCCCC[C@H](C=C)O[C@H]1[C@@H]([C</chem>      |
| C14H26O9S     | <chem>CCCCCCC(O[C@@H]1O[C@</chem>                                    | <chem>CCCCCCC(C=C)O[C@H]1[C@@H]([C@H]([</chem>    |
| C28H46O       | <chem>C[C@H](CCC(C)=C(C)C)[C@</chem>                                 | <chem>C[C@H](CCC(=C(C)C)C)[C@H]1CC[C@@</chem>     |
| C29H50O       | <chem>CC[C@H](CC[C@@H](C)[C</chem>                                   | <chem>CC[C@H](CC[C@@H](C)[C@H]1C/C=C/[</chem>     |
| C21H24O9      | <chem>OC[C@H]1O[C@@H](OC</chem>                                      | <chem>C1=CC(=CC=C1CCO[C@H]2[C@@H]([C@</chem>      |
| C21H24O9      | <chem>OC[C@H]1O[C@@H](OCCc:</chem>                                   | <chem>C1=CC(=CC=C1CCO[C@@H]2[C@@H]([C</chem>      |
| C30H50O       | <chem>CC(=C)[C@H]1CC[C@]2</chem>                                     | <chem>CC(=C)[C@H]1CC[C@]2([C@H]1[C@H</chem>       |
| C20H28O10     | <chem>O[C@H]1CO[C@@H](OC[</chem>                                     | <chem>C1[C@@H]([C@@H]([C@H]([C@@H](O</chem>       |
| C21H24O10     | <chem>OC[C@H]1O[C@@H](OCCc:</chem>                                   | <chem>C1=CC(=CC=C1C(=O)O[C@@H]2[C@H]([</chem>     |
| C21H24O10     | <chem>OC[C@H]1O[C@@H](OC</chem>                                      | <chem>C1=CC(=CC=C1C(=O)O[C@@H]2[C@H]([</chem>     |
| C30H50O2      | <chem>CC(=C)[C@H]1CC[C@]2</chem>                                     | <chem>CC(=C)[C@H]1CC[C@]2([C@H]1[C@H</chem>       |
| C21H20O11     | <chem>OC[C@H]1O[C@@H](Oc2</chem>                                     | <chem>C1=CC(=C(C=C1C2=CC(=O)C3=C(C=C(C=C</chem>   |
| C21H20O11     | <chem>OCC1OC(Oc2cc(O)c3C(=O</chem>                                   | <chem>C1=CC(=C(C=C1C2=CC(=O)C3=C(C=C(C=C</chem>   |
| C30H46O3      | <chem>CC(C)=C[C@@H]1O[C@]2</chem>                                    | <chem>CC1=C[C@@H](O[C@]23[C@@H]1[C@</chem>        |
| C30H48O3      | <chem>C[C@@H]1CC[C@@]2(CC</chem>                                     | <chem>C[C@@H]1CC[C@@]2(CC[C@@]3(C(=C</chem>       |
| C30H48O3      | <chem>CC(=C)[C@H]1CC[C@]2</chem>                                     | <chem>CC(=C)[C@H]1CC[C@]2([C@H]1[C@H</chem>       |
| C30H48O3      | <chem>CC(=C)[C@H]1CC[C@]2</chem>                                     | <chem>CC(=C)[C@H]1CC[C@]2([C@H]1[C@H</chem>       |
| C30H48O3      | <chem>CC(=C)[C@H]1CC[C@@</chem>                                      | <chem>CC(=C)[C@H]1CC[C@]2([C@H]1[C@H</chem>       |
| C23H26O11     | <chem>OC[C@H]1O[C@@H](OC</chem>                                      | <chem>C1=CC(=C(C=C1CCO[C@H]2[C@@H]([C</chem>      |
| C23H26O11     | <chem>OC[C@H]1O[C@@H](OC</chem>                                      | <chem>C1=CC(=C(C=C1CCO[C@H]2[C@@H]([C</chem>      |
| C23H26O11     | <chem>OC[C@H]1O[C@@H](OCCc:</chem>                                   | <chem>C1=CC(=C(C=C1CCO[C@@H]2[C@@H]([</chem>      |
| C24H28O11     | <chem>COc1cc(\C=C\C(O)=O)[C@</chem>                                  | <chem>COC1=C(C=CC(=C1)/C=C/C(=O)O[C@@H</chem>     |
| C24H28O11     | <chem>COc1cc(\C=C\C(O)=O)[C@</chem>                                  | <chem>COC1=C(C=CC(=C1)/C=C/C(=O)O[C@@H</chem>     |
| C27H48O9      | <chem>CCCCC\C=C/C/C=C\CCCC</chem>                                    | <chem>CCCCC/C=C\C/C=C\CCCCCCCC(=O)OC[C</chem>     |
| C27H48O9      | <chem>CCCCCC=CCC=CCCCCCCC</chem>                                     | <chem>CCCCCC=CCC=CCCCCCCCC(=O)OCC(COC</chem>      |
| C26H32O12     | <chem>OC[C@H]1O[C@@H](OC</chem>                                      | <chem>C1[C@@]([C@H]([C@@H](O1)O[C@@</chem>        |
| C34H30N2O5    | <chem>COc1cc2CCN(C)[C@H]3C</chem>                                    | <chem>CN1CCC2=CC(=C3C4=C2[C@@H]1CC5=</chem>       |
| C32H44O8      | <chem>CC(=O)OC(C)(C)\C=C(=O</chem>                                   | <chem>CC(=O)OC(C)(C)/C=C/C(=O)[C@@](C)[[C@</chem> |
| C35H34N2O5    | <chem>COc1cc2CCN(C)[C@H]3C</chem>                                    | <chem>CN1CCC2=CC(=C3C4=C2[C@@H]1CC5=</chem>       |
| C32H44O9      | <chem>CC(=O)OC(C)(C)\C=C(=O</chem>                                   | <chem>CC(=O)OC(C)(C)/C=C/C(=O)[C@@](C)[[C@</chem> |
| C32H44O9      | <chem>CC(=O)OC(C)(C)\C=C(=O</chem>                                   | <chem>CC(=O)OC(C)(C)/C=C/C(=O)[C@@](C)[[C@</chem> |
| C35H58O6      | <chem>CC[C@H](\C=C\C[O]H)(C</chem>                                   | <chem>CC[C@H](/C=C/[C@H](C)[C@H]1CC[C</chem>      |
| C35H60O6      | <chem>CC[C@H](CC[C@@H](C)[C</chem>                                   | <chem>CC[C@H](CC[C@@H](C)[C@H]1CC[C@@</chem>      |
| C35H60O6      | <chem>CC[C@H](CC[C@@H](C)[C</chem>                                   | <chem>CC[C@H](CC[C@@H](C)[C@H]1C/C=C/[</chem>     |
| C35H60O6      | <chem>CC[C@H](CC[C@@H](C)[C</chem>                                   | <chem>CC[C@H](CC[C@@H](C)[C@H]1C/C=C/[</chem>     |
| C34H46O9      | <chem>CC(=O)O[C@@H]1C[C@</chem>                                      | <chem>CC(=O)O[C@@H]1C[C@]2([C@@H]3CC</chem>       |
| C35H56O8      | <chem>CC(C)=C[C@H]1C[C@](C)</chem>                                   | <chem>CC(=C[C@H]1C[C@]([C@@H]2[C@@H]</chem>       |

|            |                                                         |
|------------|---------------------------------------------------------|
| C35H56O8   | CC(C)=CC1CC(C)(O)C2C3C CC(=CC1CC(C2C3CCC4C5(CCC(C(C5CCC |
| C38H42N2O6 | COc1ccc2C[C@H]3N(C)C( CN1CCC2=CC(=C3C=C2[C@H]1CC4=CC=   |
| C29H36O15  | C[C@@H]1O[C@@H](O[C C[C@H]1[C@@H]([C@H]([C@H]([C@@      |
| C36H58O9   | CC(C)=C[C@@H]1CO[C@ CC(=C[C@@H]1CO[C@]23C[C@]4(CO2)     |
| C31H40O15  | COc1ccc(CCO[C@@H]2O C[C@H]1[C@@H]([C@H]([C@H]([C@@      |
| C32H42O15  | COc1ccc(CCO[C@@H]2O C[C@H]1[C@@H](O[C@H]([C@@H]([C@     |
| C32H42O15  | COc1ccc(CCOc2OC(CO)C( CC1C(OC(C(C1O)O)OC2C(C(OC(C2OC(=O |
| C40H64O12  | CC(C)=C[C@H]1C[C@](C)( CC(=C[C@H]1C[C@]([C@@H]2[C@H]3C  |
| C40H64O12  | CC(C)=C[C@@H]1CO[C@ CC(=C[C@@H]1CO[C@]23C[C@]4(CO2)     |
| C40H64O12  | CC(C)=C[C@H]1C[C@](C)( CC(=C[C@H]1C[C@]([C@@H]2[C@H]3C  |
| C40H64O12  | CC(C)=C[C@@H]1CO[C@ CC(=C[C@@H]1CO[C@]23C[C@]4(CO2)     |
| C40H64O12  | CC(C)=C[C@H]1C[C@](C)( CC(=C[C@H]1C[C@]([C@@H]2[C@H]3C  |
| C40H64O12  | CC(C)=C[C@@H]1CO[C@ CC(=C[C@@H]1CO[C@]23C[C@]4(CO2)     |
| C40H64O12  | CC(C)=C[C@H]1C[C@](C)( CC(=C[C@H]1C[C@]([C@@H]2[C@H]3C  |
| C40H64O12  | CC(C)=CC1CO[C@]23C[C@ CC(=CC1CO[C@]23C[C@]4(CO2)[C@@H   |
| C40H64O12  | CC(C)=C[C@H]1C[C@](C)( CC(=C[C@H]1C[C@]([C@@H]2[C@H]3C  |
| C40H64O12  | CC(C)=C[C@H]1C[C@](C)( CC(=C[C@H]1C[C@]([C@@H]2[C@H]3C  |
| C41H66O13  | CC(C)=C[C@@H]1CO[C@ CC(=C[C@@H]1CO[C@]23C[C@]4(CO2)     |
| C41H66O13  | CC(C)=C[C@@H]1CO[C@ CC(=C[C@@H]1CO[C@]23C[C@]4(CO2)     |
| C41H66O13  | CC(C)=C[C@H]1C[C@](C)( CC(=C[C@H]1C[C@]([C@@H]2[C@H]3C  |
| C41H66O13  | CC(C)=C[C@@H]1CO[C@ CC(=C[C@@H]1CO[C@]23C[C@]4(CO2)     |
| C41H66O13  | CC(C)=C[C@@H]1C[C@](C CC(=C[C@@H]1C[C@]([C@@H]2[C@H]3C  |
| C41H66O13  | CC(C)=C[C@@H]1C[C@](C CC(=C[C@@H]1C[C@]([C@@H]2[C@H]3C  |
| C41H66O13  | CC(C)=C[C@@H]1CO[C@ CC(=C[C@@H]1CO[C@]23C[C@]4(CO2)     |
| C41H66O13  | CC(C)=CC1CO[C@]23C[C@ CC(=CC1CO[C@]23C[C@]4(CO2)[C@@H   |
| C41H66O13  | CC(C)=CC1CC(C)(O)C2C3C CC(=CC1CC(C2C3CCC4C5(CCC(C(C5CCC |
| C41H68O13  | CC(C)=CCC[C@](C)(O)[C@ CC(=CCC[C@@](C)([C@@H]1[C@H]2CC  |
| C42H66O13  | CC(C)=C[C@@H]1CO[C@ CC1=C2[C@H]3CC[C@@H]4[C@]5(CC[C     |
| C42H68O14  | CC(C)=C[C@@H]1CO[C@ CC(=C[C@@H]1CO[C@]23C[C@]4(CO2)     |
| C42H68O14  | CC(C)=C[C@@H]1C[C@](C CC(=C[C@@H]1C[C@]([C@H]2[C@@H]3C  |
| C42H68O14  | CC(C)=C[C@H]1C[C@](C)( CC(=C[C@H]1C[C@]([C@@H]2[C@H]3C  |
| C42H68O14  | CC(C)=C[C@@H]1CO[C@ CC(=C[C@@H]1CO[C@]23C[C@]4(CO2)     |
| C41H66O16S | CC(C)=C[C@@H]1CO[C@ CC(=C[C@@H]1CO[C@]23C[C@]4(CO2)     |
| C41H66O16S | CC(C)=C[C@@H]1CO[C@ CC(=C[C@@H]1CO[C@]23C[C@]4(CO2)     |
| C41H66O16S | CC(C)=C[C@@H]1CO[C@ CC(=C[C@@H]1CO[C@]23C[C@]4(CO2)     |
| C46H74O17  | CC(C)=C[C@H]1C[C@](C)( CC(=C[C@H]1C[C@]([C@@H]2[C@H]3C  |
| C46H74O17  | CC(C)=C[C@@H]1C[C@](C CC(=C[C@@H]1C[C@]([C@H]2[C@@H]3C  |
| C46H74O17  | CC(C)=C[C@@H]1CO[C@ CC(=C[C@@H]1CO[C@]23C[C@]4(CO2)     |
| C46H74O17  | CC(C)=C[C@@H]1CO[C@ CC(=C[C@@H]1CO[C@]23C[C@@]4(CO      |
| C46H74O17  | CC(C)=C[C@@H]1CO[C@ CC(=C[C@@H]1CO[C@]23C[C@]4(CO2)     |
| C46H74O17  | CC(C)=CC1C[C@@](C)(O)[ CC(=CC1C[C@@]([C@@H]2[C@H]3CC(C  |
| C46H74O17  | CC(C)=CC1C[C@](C)(O)[C@ CC(=CC1C[C@]([C@@H]2[C@@H]3CC(C |
| C46H74O17  | CC(C)=CC1COC23CC4(CO CC(=CC1COC23CC4(CO2)C(C3C1(C)O)CC  |
| C47H76O18  | CC(C)=C[C@@H]1C[C@@ CC(=C[C@@H]1C[C@@]([C@H]2[C@@H]3C   |
| C47H76O18  | CC(C)=C[C@H]1C[C@](C)( CC(=C[C@H]1C[C@]([C@@H]2[C@H]3C  |
| C47H76O18  | CC(C)=C[C@@H]1CO[C@ CC(=C[C@@H]1CO[C@]23C[C@]4(CO2)     |
| C47H76O18  | CC(C)=C[C@@H]1CO[C@ CC(=C[C@@H]1CO[C@]23C[C@]4(CO2)     |
| C47H76O18  | CC(C)=C[C@@H]1C[C@@ CC(=C[C@@H]1C[C@@]([C@@H]2[C@@H]3C  |
| C47H76O18  | CC(C)=C[C@H]1C[C@](C)( CC(=C[C@H]1C[C@]([C@@H]2[C@H]3C  |

|            |                                                          |
|------------|----------------------------------------------------------|
| C47H76O18  | CC(C)=CC1CC(C)(O)C2C3C CC(=CC1CC(C2C3CCC4C5(CCC(C(C5CCC  |
| C46H74O20S | CC(C)=C[C@@H]1CO[C@ CC(=C[C@@H]1CO[C@]23C[C@]4(CO2)      |
| C46H74O20S | CC(C)=C[C@@H]1CO[C@ CC(=C[C@@H]1CO[C@]23C[C@@]4(CO       |
| C46H74O20S | CC(C)=C[C@@H]1CO[C@ CC(=C[C@@H]1CO[C@]23C[C@]4(CO2)      |
| C46H74O20S | CC(C)=C[C@@H]1CO[C@ CC(=C[C@@H]1CO[C@]23C[C@]4(CO2)      |
| C47H76O21S | CC(C)=C[C@@H]1CO[C@ CC(=C[C@@H]1CO[C@]23C[C@@]4(CO       |
| C51H82O21  | CC(C)=C[C@H]1C[C@](C)( CC(=C[C@H]1C[C@]([C@@H]2[C@H]3C   |
| C51H82O21  | CC(C)=C[C@H]1C[C@](C)( CC(=C[C@H]1C[C@]([C@@H]2[C@H]3CC[ |
| C51H82O21  | CC(C)=C[C@@H]1C[C@]( CC(=C[C@@H]1C[C@]([C@@H]2[C@]3(     |
| C51H82O21  | CC(C)=CC1C[C@](C)(O[C@ CC(=CC1C[C@]([C@@H]2[C@H]3CC[C@   |
| C52H84O22  | CC(C)=C[C@H]1C[C@](C)( CC(=C[C@H]1C[C@]([C@@H]2[C@H]3C   |
| C52H84O22  | CC(C)=C[C@H]1C[C@](C)( CC(=C[C@H]1C[C@]([C@@H]2[C@H]3C   |
| C52H84O22  | CC(C)=C[C@@H]1C[C@]( CC(=C[C@@H]1C[C@]([C@@H]2[C@]3(     |
| C52H84O22  | CC(C)=CC1C[C@](C)(O[C@ CC(=CC1C[C@]([C@@H]2[C@H]3CC[C@   |
| C52H84O22  | CC(C)=C[C@@H]1CO[C@ CC(=C[C@@H]1CO[C@]23C[C@]4(CO2)      |
| C52H84O22  | CC(C)=CC1C[C@@](C)(O( CC(=CC1C[C@@]([C@@H]2[C@H]3CC(C    |
| C54H80O24  | C[C@@H]1O[C@@H](O[C C[C@H]1[C@@H]([C@H]([C@H]([C@@       |
| C54H80O24  | C[C@H]1O[C@@H](O[C@ C[C@@H]1[C@H]([C@@H]([C@H]([C@       |
| C54H80O25  | C[C@@H]1O[C@@H](O[C C[C@H]1[C@@H]([C@H]([C@H]([C@@       |
| C54H80O25  | C[C@H]1O[C@@H](O[C@ C[C@@H]1[C@H]([C@@H]([C@H]([C@       |

from Datawarrior tool

| Molweight | cLogP    | cLogS  | H-Acceptor | H-Donors | Druglikene: | Mutagenic | Tumorigeni |
|-----------|----------|--------|------------|----------|-------------|-----------|------------|
| 124.139   | 0.7166   | -1.204 | 2          | 2        | -2.2456     | high      | none       |
| 138.122   | -2.855   | -1.333 | 3          | 1        | -5.5215     | none      | none       |
| 196.245   | 0.9068   | -1.92  | 3          | 1        | -4.2161     | none      | none       |
| 208.212   | 1.3339   | -2.035 | 4          | 1        | 0.27506     | none      | none       |
| 208.212   | 1.3339   | -2.035 | 4          | 1        | 0.27506     | none      | none       |
| 270.239   | 2.3357   | -2.856 | 5          | 3        | 0.28194     | high      | none       |
| 286.238   | 1.99     | -2.56  | 6          | 4        | 0.28194     | none      | none       |
| 290.354   | 0.6592   | -1.844 | 6          | 4        | -18.542     | none      | high       |
| 290.354   | 0.6592   | -1.844 | 6          | 4        | -18.542     | none      | high       |
| 302.237   | 1.4902   | -2.491 | 7          | 5        | -0.08283    | high      | high       |
| 316.305   | -1.0361  | -0.72  | 8          | 6        | -4.6724     | none      | none       |
| 316.305   | -1.0361  | -0.72  | 8          | 6        | -4.6724     | none      | none       |
| 356.326   | -0.7789  | -1.421 | 9          | 5        | -5.8493     | none      | none       |
| 370.417   | -0.9556  | -0.698 | 9          | 4        | -13.857     | none      | high       |
| 370.417   | -0.9556  | -0.698 | 9          | 4        | -13.857     | none      | high       |
| 398.672   | 7.9248   | -6.099 | 1          | 1        | -5.0079     | none      | none       |
| 414.715   | 8.6758   | -6.558 | 1          | 1        | -5.6667     | none      | none       |
| 420.413   | 0.8923   | -2.3   | 9          | 5        | -1.455      | none      | none       |
| 420.413   | 0.8923   | -2.3   | 9          | 5        | -1.455      | none      | none       |
| 426.726   | 7.6469   | -6.803 | 1          | 1        | -22.172     | none      | none       |
| 428.432   | -1.2487  | -1.546 | 10         | 6        | -4.6719     | none      | none       |
| 436.412   | 0.5466   | -2.004 | 10         | 6        | -1.455      | none      | none       |
| 436.412   | 0.5466   | -2.004 | 10         | 6        | -1.455      | none      | none       |
| 442.725   | 6.7202   | -6.296 | 2          | 2        | -23.933     | none      | none       |
| 448.379   | 7.00E-04 | -2.446 | 11         | 7        | -3.2535     | none      | none       |
| 448.379   | 7.00E-04 | -2.446 | 11         | 7        | -3.2535     | none      | none       |
| 454.692   | 6.1234   | -5.829 | 3          | 1        | -0.45158    | none      | none       |
| 456.708   | 6.0021   | -6.111 | 3          | 2        | -3.658      | none      | none       |
| 456.708   | 6.3706   | -6.278 | 3          | 2        | -21.111     | none      | none       |
| 456.708   | 6.3706   | -6.278 | 3          | 2        | -21.111     | none      | none       |
| 456.708   | 6.3706   | -6.278 | 3          | 2        | -21.49      | none      | none       |
| 478.448   | 0.5301   | -2.078 | 11         | 7        | -3.1704     | none      | none       |
| 478.448   | 0.5301   | -2.078 | 11         | 7        | -2.0433     | none      | none       |
| 478.448   | 0.5301   | -2.078 | 11         | 7        | -3.1704     | none      | none       |
| 492.475   | 0.8058   | -2.392 | 11         | 6        | -2.9905     | none      | none       |
| 492.475   | 0.8058   | -2.392 | 11         | 6        | -2.9905     | none      | none       |
| 516.669   | 3.9699   | -3.815 | 9          | 5        | -28.768     | none      | high       |
| 516.669   | 3.9699   | -3.815 | 9          | 5        | -28.768     | none      | high       |
| 536.528   | -0.1157  | -2.156 | 12         | 6        | -0.54316    | none      | none       |
| 546.621   | 6.8386   | -9.35  | 7          | 1        | 4.9691      | low       | none       |
| 556.693   | 3.3832   | -4.694 | 8          | 3        | -4.6016     | none      | none       |
| 562.664   | 7.0099   | -8.195 | 7          | 1        | 4.6261      | low       | none       |
| 572.692   | 2.5311   | -4.295 | 9          | 4        | -4.6795     | none      | none       |
| 572.692   | 2.5311   | -4.295 | 9          | 4        | -4.6795     | none      | none       |
| 574.84    | 5.7659   | -6.141 | 6          | 4        | -2.8093     | none      | none       |
| 576.855   | 6.0181   | -6.369 | 6          | 4        | -8.3009     | none      | none       |
| 576.855   | 6.8387   | -6.258 | 6          | 4        | -9.4747     | none      | none       |
| 576.855   | 6.8387   | -6.258 | 6          | 4        | -9.4747     | none      | none       |
| 598.73    | 3.8678   | -5.104 | 9          | 2        | -4.5012     | none      | none       |
| 604.822   | 4.1694   | -5.472 | 8          | 4        | -4.7063     | none      | none       |

|         |         |        |    |    |          |      |      |
|---------|---------|--------|----|----|----------|------|------|
| 604.822 | 4.1694  | -5.472 | 8  | 4  | -4.7063  | none | none |
| 622.759 | 6.501   | -7.334 | 8  | 0  | 4.6496   | none | none |
| 624.59  | -0.3803 | -2.285 | 15 | 9  | -0.5767  | none | none |
| 634.848 | 3.512   | -5.125 | 9  | 5  | -4.7595  | none | none |
| 652.644 | 0.1711  | -2.913 | 15 | 7  | -0.415   | none | none |
| 666.67  | 0.3658  | -2.965 | 15 | 7  | -3.7289  | none | none |
| 666.67  | 0.3658  | -2.965 | 15 | 7  | -3.7289  | none | none |
| 736.936 | 2.8424  | -5.301 | 12 | 6  | -5.6748  | none | none |
| 736.936 | 2.787   | -5.083 | 12 | 6  | -2.5874  | none | none |
| 736.936 | 2.9343  | -5.301 | 12 | 6  | -5.4857  | none | none |
| 736.936 | 2.787   | -5.083 | 12 | 6  | -6.0274  | none | none |
| 736.936 | 2.8424  | -5.301 | 12 | 6  | -5.6748  | none | none |
| 736.936 | 2.9343  | -5.301 | 12 | 6  | -5.4857  | none | none |
| 736.936 | 2.787   | -5.083 | 12 | 6  | -6.0274  | none | none |
| 736.936 | 2.9343  | -5.301 | 12 | 6  | -5.4857  | none | none |
| 736.936 | 2.8424  | -5.301 | 12 | 6  | -2.2348  | none | none |
| 766.962 | 2.2769  | -4.954 | 13 | 7  | -4.4957  | none | none |
| 766.962 | 2.2769  | -4.954 | 13 | 7  | -4.4957  | none | none |
| 766.962 | 2.3323  | -5.172 | 13 | 7  | -4.151   | none | none |
| 766.962 | 2.185   | -4.954 | 13 | 7  | -4.0453  | none | none |
| 766.962 | 2.2404  | -5.172 | 13 | 7  | -3.689   | none | none |
| 766.962 | 2.3323  | -5.172 | 13 | 7  | -4.151   | none | none |
| 766.962 | 2.185   | -4.954 | 13 | 7  | -4.0616  | none | none |
| 766.962 | 2.185   | -4.954 | 13 | 7  | -4.0453  | none | none |
| 766.962 | 2.2404  | -5.172 | 13 | 7  | -3.689   | none | none |
| 768.978 | 2.7884  | -4.977 | 13 | 8  | -17.532  | none | none |
| 778.973 | 2.5647  | -4.975 | 13 | 7  | -5.4262  | none | none |
| 796.988 | 1.6749  | -4.825 | 14 | 8  | -4.7595  | none | none |
| 796.988 | 1.7303  | -5.043 | 14 | 8  | -4.4097  | none | none |
| 796.988 | 1.7303  | -5.043 | 14 | 8  | -4.4097  | none | none |
| 796.988 | 1.6749  | -4.825 | 14 | 8  | -4.7595  | none | none |
| 847.025 | 0.6621  | -3.808 | 16 | 7  | 0.045906 | none | none |
| 847.025 | 0.6621  | -3.808 | 16 | 7  | 0.045906 | none | none |
| 847.025 | 0.5702  | -3.808 | 16 | 7  | -2.4025  | none | none |
| 899.077 | 1.0053  | -5.001 | 17 | 9  | -6.3015  | none | none |
| 899.077 | 1.0053  | -5.001 | 17 | 9  | -6.3015  | none | none |
| 899.077 | 0.9499  | -4.783 | 17 | 9  | -6.6463  | none | none |
| 899.077 | 0.9499  | -4.783 | 17 | 9  | -6.6463  | none | none |
| 899.077 | 0.9499  | -4.783 | 17 | 9  | -6.6463  | none | none |
| 899.077 | 0.9499  | -4.783 | 17 | 9  | -6.6463  | none | none |
| 899.077 | 0.9499  | -4.783 | 17 | 9  | -6.6463  | none | none |
| 899.077 | 0.8926  | -4.783 | 17 | 9  | -7.3504  | none | none |
| 899.077 | 0.9499  | -4.783 | 17 | 9  | -6.6463  | none | none |
| 899.077 | 0.9499  | -4.783 | 17 | 9  | -6.6463  | none | none |
| 899.077 | 1.0053  | -5.001 | 17 | 9  | -6.3015  | none | none |
| 899.077 | 1.0053  | -5.001 | 17 | 9  | -6.3015  | none | none |
| 899.077 | 0.9499  | -4.783 | 17 | 9  | -6.6463  | none | none |
| 929.102 | 0.4033  | -4.872 | 18 | 10 | -6.5608  | none | none |
| 929.102 | 0.4033  | -4.872 | 18 | 10 | -6.5608  | none | none |
| 929.102 | 0.3479  | -4.654 | 18 | 10 | -6.9107  | none | none |
| 929.102 | 0.3479  | -4.654 | 18 | 10 | -6.9107  | none | none |
| 929.102 | 0.4033  | -4.872 | 18 | 10 | -6.5608  | none | none |
| 929.102 | 0.4033  | -4.872 | 18 | 10 | -6.5608  | none | none |

|         |         |        |    |    |         |      |      |
|---------|---------|--------|----|----|---------|------|------|
| 929.102 | 0.4033  | -4.872 | 18 | 10 | -6.5608 | none | none |
| 979.14  | -0.6649 | -3.637 | 20 | 9  | -2.0776 | none | none |
| 979.14  | -0.6649 | -3.637 | 20 | 9  | -2.0776 | none | none |
| 979.14  | -0.6649 | -3.637 | 20 | 9  | -2.0776 | none | none |
| 979.14  | -0.6649 | -3.637 | 20 | 9  | -2.0776 | none | none |
| 979.14  | -0.6649 | -3.637 | 20 | 9  | -2.0776 | none | none |
| 1009.17 | -1.2669 | -3.508 | 21 | 10 | -2.3326 | none | none |
| 1031.19 | -0.2298 | -4.83  | 21 | 11 | -11.832 | none | none |
| 1031.19 | -0.2298 | -4.83  | 21 | 11 | -11.832 | none | none |
| 1031.19 | -0.2298 | -4.83  | 21 | 11 | -11.832 | none | none |
| 1031.19 | -0.2298 | -4.83  | 21 | 11 | -11.832 | none | none |
| 1061.22 | -0.8318 | -4.701 | 22 | 12 | -11.832 | none | none |
| 1061.22 | -0.8318 | -4.701 | 22 | 12 | -11.832 | none | none |
| 1061.22 | -0.8318 | -4.701 | 22 | 12 | -11.832 | none | none |
| 1061.22 | -0.8318 | -4.701 | 22 | 12 | -11.832 | none | none |
| 1061.22 | -0.8872 | -4.483 | 22 | 12 | -11.977 | none | none |
| 1061.22 | -0.8318 | -4.701 | 22 | 12 | -11.832 | none | none |
| 1113.21 | -0.9997 | -4.766 | 24 | 11 | -3.3349 | none | none |
| 1113.21 | -0.9997 | -4.766 | 24 | 11 | -3.3349 | none | none |
| 1129.2  | -1.8518 | -4.367 | 25 | 12 | -3.445  | none | none |
| 1129.2  | -1.8518 | -4.367 | 25 | 12 | -3.445  | none | none |

| Reproducti | Irritant | DrugScore |
|------------|----------|-----------|
| none       | high     | 0.192684  |
| none       | none     | 0.492461  |
| none       | none     | 0.485792  |
| none       | none     | 0.744349  |
| none       | none     | 0.744349  |
| none       | none     | 0.418889  |
| none       | none     | 0.709568  |
| none       | low      | 0.224854  |
| none       | low      | 0.224854  |
| none       | none     | 0.241775  |
| none       | none     | 0.475719  |
| none       | none     | 0.475719  |
| none       | none     | 0.456496  |
| none       | low      | 0.217332  |
| none       | low      | 0.217332  |
| none       | none     | 0.146393  |
| none       | none     | 0.130941  |
| none       | none     | 0.49187   |
| none       | none     | 0.49187   |
| none       | none     | 0.129817  |
| none       | high     | 0.253534  |
| none       | none     | 0.485366  |
| none       | none     | 0.485366  |
| none       | none     | 0.145647  |
| none       | none     | 0.411052  |
| none       | none     | 0.411052  |
| none       | high     | 0.138089  |
| none       | none     | 0.164992  |
| none       | none     | 0.148929  |
| none       | none     | 0.148929  |
| none       | none     | 0.148929  |
| none       | none     | 0.394199  |
| none       | none     | 0.422406  |
| none       | none     | 0.394199  |
| none       | none     | 0.382309  |
| none       | none     | 0.382309  |
| none       | none     | 0.166795  |
| none       | none     | 0.166795  |
| low        | none     | 0.369163  |
| none       | none     | 0.156514  |
| none       | low      | 0.19505   |
| none       | none     | 0.152708  |
| none       | low      | 0.20961   |
| none       | low      | 0.20961   |
| none       | none     | 0.139368  |
| none       | none     | 0.122218  |
| none       | none     | 0.11151   |
| none       | none     | 0.11151   |
| none       | low      | 0.161504  |
| none       | high     | 0.10851   |

|      |      |          |
|------|------|----------|
| none | high | 0.10851  |
| none | none | 0.189929 |
| none | none | 0.388804 |
| none | high | 0.117551 |
| none | none | 0.374227 |
| none | none | 0.268516 |
| none | none | 0.268516 |
| none | high | 0.107304 |
| none | high | 0.119065 |
| none | high | 0.106878 |
| none | high | 0.111548 |
| none | high | 0.107304 |
| none | high | 0.106878 |
| none | high | 0.111548 |
| none | high | 0.106878 |
| none | high | 0.117276 |
| none | high | 0.115418 |
| none | high | 0.115418 |
| none | high | 0.111567 |
| none | high | 0.116428 |
| none | high | 0.112855 |
| none | high | 0.111567 |
| none | high | 0.116396 |
| none | high | 0.116428 |
| none | high | 0.112855 |
| none | high | 0.111451 |
| none | low  | 0.150127 |
| none | high | 0.11789  |
| none | high | 0.114023 |
| none | high | 0.114023 |
| none | high | 0.11789  |
| none | high | 0.202073 |
| none | high | 0.202073 |
| none | high | 0.144869 |
| none | high | 0.11259  |
| none | high | 0.11259  |
| none | high | 0.11666  |
| none | high | 0.116639 |
| none | high | 0.11666  |
| none | high | 0.11666  |
| none | high | 0.11259  |
| none | high | 0.11259  |
| none | high | 0.11666  |
| none | high | 0.115145 |
| none | high | 0.115145 |
| none | high | 0.119163 |
| none | high | 0.119163 |
| none | high | 0.115145 |
| none | high | 0.115145 |



|      |      |          |
|------|------|----------|
| none | high | 0.115145 |
| none | high | 0.149928 |
| none | high | 0.148467 |
| none | high | 0.115569 |
| none | high | 0.118033 |
| none | high | 0.12196  |
| none | high | 0.118033 |
| none | low  | 0.161086 |
| none | low  | 0.161086 |
| none | low  | 0.170428 |
| none | low  | 0.170428 |
