# Supplementary material for: Bio-Computational Evaluation of Compounds of Bacopa Monnieri as a Potential Treatment for Schizophrenia
Source: MDPI journal article supplement (doi:10.3390/molecules27207050), 2022-10-19
Supplement: s1 [file s1]

Table S3: Selected natural compounds chemical and structural information.

| S.No. | Natural compounds IDs             | IUPAC name                                                                                                                                                                                                                                                                                                   | SMILES                                                                                            | 2D Structures                                                                                                                                                                                                                                                                                                                                                                                                                                                                                                                                              |
|-------|-----------------------------------|--------------------------------------------------------------------------------------------------------------------------------------------------------------------------------------------------------------------------------------------------------------------------------------------------------------|---------------------------------------------------------------------------------------------------|------------------------------------------------------------------------------------------------------------------------------------------------------------------------------------------------------------------------------------------------------------------------------------------------------------------------------------------------------------------------------------------------------------------------------------------------------------------------------------------------------------------------------------------------------------|
| 1.    | Drug as a Control<br>Quetiapine   | 2-[2-(4-benzo[b][1,4]benzothiazepin-6-yl)piperazin-1-yl]ethoxy]ethanol                                                                                                                                                                                                                                       | <chem>C1CN(CCN1CCOCCO)C2=NC3=CC=CC=C3SC4=CC=CC=C42</chem>                                         | 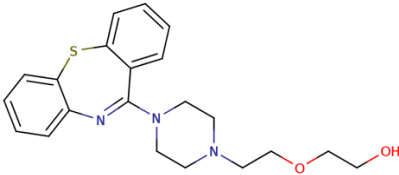 The chemical structure of Quetiapine is shown. It features a benzothiazine core system. A piperazine ring is attached to the benzothiazine at the 4-position. The piperazine ring is further substituted with a 2-(4-hydroxyphenoxy)ethyl group at the 1-position.                                                                                                                                                                                                     |
| 2.    | STXBP1_CID:5319292<br>Martynoside | [(2 <i>R</i> ,3 <i>R</i> ,4 <i>R</i> ,5 <i>R</i> ,6 <i>R</i> )-5-hydroxy-6-[2-(3-hydroxy-4-methoxyphenyl)ethoxy]-2-(hydroxymethyl)-4-[(2 <i>S</i> ,3 <i>R</i> ,4 <i>R</i> ,5 <i>R</i> ,6 <i>S</i> )-3,4,5-trihydroxy-6-methyloxan-2-yl]oxyoxan-3-yl] ( <i>E</i> )-3-(4-hydroxy-3-methoxyphenyl)prop-2-enoate | <chem>CC1C(C(C(C(O1)OC2C(C(OC(C2OC(=O)C=CC3=CC(=C(C=C3)O)OC)CO)OCCC4=CC(=C(C=C4)OC)O)O)O)O</chem> |  The chemical structure of Martynoside is shown. It is a complex molecule consisting of a central glycosidic linkage between two sugar units. The left sugar unit is a hexose derivative with multiple hydroxyl groups and a methyl group. The right sugar unit is a hexose derivative with a hydroxyl group and a methyl group. The two sugar units are linked via an ester bond. The structure also includes a phenyl ring with a hydroxyl group and a methyl group. |

|    |                                         |                                                                                                                                                                                                                                                                                                  |                                                                                                  |                                                                                      |
|----|-----------------------------------------|--------------------------------------------------------------------------------------------------------------------------------------------------------------------------------------------------------------------------------------------------------------------------------------------------|--------------------------------------------------------------------------------------------------|--------------------------------------------------------------------------------------|
| 3. | STXBP1_CID:5281800<br>Acteoside         | [(2 <i>R</i> ,3 <i>R</i> ,4 <i>R</i> ,5 <i>R</i> ,6 <i>R</i> )-6-[2-(3,4-dihydroxyphenyl)ethoxy]-5-hydroxy-2-(hydroxymethyl)-4-[(2 <i>S</i> ,3 <i>R</i> ,4 <i>R</i> ,5 <i>R</i> ,6 <i>S</i> )-3,4,5-trihydroxy-6-methyloxan-2-yl]oxyoxan-3-yl] ( <i>E</i> )-3-(3,4-dihydroxyphenyl)prop-2-enoate | <chem>CC1C(C(C(C(O1)OC2C(C(OC(C2OC(=O)C=CC3=CC(=C(C=C3)O)O)CO)OCCC4=CC(=C(C=C4)O)O)O)O)O</chem>  | 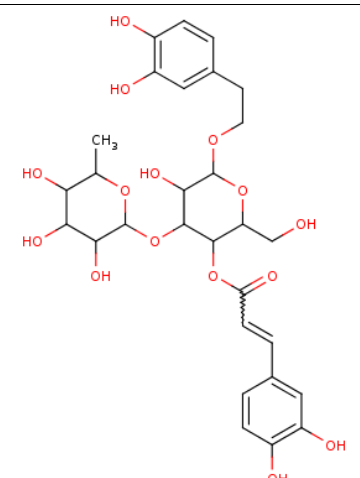  |
| 4. | STXBP1_CID:44559250<br>Dehydroapateline | (21 <i>S</i> )-27-methoxy-22-methyl-15,29,31-trioxa-7,22-diazaoctacyclo[19.9.3.2 <sup>16,19</sup> .1 <sup>4,30</sup> .1 <sup>10,14</sup> .0 <sup>3,8</sup> .0 <sup>25,33</sup> .0 <sup>28,32</sup> ]heptatriaconta-1(30),2,4(34),7,10(37),11,13,16,18,25,27,32,35-tridecaen-13-ol                | <chem>CN1CCC2=CC(=C3C4=C2C1CC5=CC=C(C=C5)OC6=C(C=CC(=C6)CC7=NCCCC8=CC(=C(O4)C=C87)O3)O)OC</chem> |  |

|    |                                              |                                                                                                                                                                                                                                                                                                                                                                                                                                                                                                                                            |                                                                                                                            |  |
|----|----------------------------------------------|--------------------------------------------------------------------------------------------------------------------------------------------------------------------------------------------------------------------------------------------------------------------------------------------------------------------------------------------------------------------------------------------------------------------------------------------------------------------------------------------------------------------------------------------|----------------------------------------------------------------------------------------------------------------------------|--|
| 5. | STXBP1_CID:5291488<br>Luteolin 7-galactoside | 2-(3,4-dihydroxyphenyl)-5-hydroxy-7-[3,4,5-trihydroxy-6-(hydroxymethyl)oxan-2-yl]oxychromen-4-one                                                                                                                                                                                                                                                                                                                                                                                                                                          | <chem>C1=CC(=C(C=C1C2=CC(=O)C3=C(C=C(C=C3O2)OC4C(C(C(C(O4)CO)O)O)O)O)O</chem>                                              |  |
| 6. | STXBP1_CID:11145924<br>Bacopaside C          | [(3 <i>S</i> ,4 <i>R</i> ,5 <i>S</i> )-5-[(2 <i>R</i> ,3 <i>R</i> ,4 <i>S</i> ,5 <i>S</i> ,6 <i>R</i> )-4,5-dihydroxy-6-(hydroxymethyl)-2-(2-phenylethoxy)oxan-3-yl]oxy-3,4-dihydroxyoxolan-3-yl]methyl 4-hydroxybenzoate                                                                                                                                                                                                                                                                                                                  | <chem>C1C(C(C(O1)OC2C(C(C(OC2OCCC3=CC=CC=C3)CO)O)O)O)(COC(=O)C4=CC=C(C=C4)O)O</chem>                                       |  |
| 7. | STXBP1_CID:15922618<br>Bacopaside III        | [(2 <i>R</i> ,3 <i>S</i> ,4 <i>S</i> ,5 <i>R</i> ,6 <i>S</i> )-6-[(2 <i>S</i> ,3 <i>R</i> ,4 <i>S</i> ,5 <i>S</i> )-3,5-dihydroxy-2-[[[(1 <i>S</i> ,2 <i>R</i> ,5 <i>R</i> ,7 <i>S</i> ,10 <i>R</i> ,11 <i>R</i> ,14 <i>R</i> ,15 <i>S</i> ,16 <i>S</i> ,17 <i>R</i> ,20 <i>R</i> )-16-hydroxy-2,6,6,10,16-pentamethyl-17-(2-methylprop-1-enyl)-19,21-dioxahexacyclo[18.2.1.0 <sup>1,14</sup> .0 <sup>2,11</sup> .0 <sup>5,10</sup> .0 <sup>15,20</sup> ]tricosan-7-yl]oxy]oxan-4-yl]oxy-3,4,5-trihydroxyoxan-2-yl]methyl hydrogen sulfate | <chem>CC(=CC1COC23CC4(CO2)C(C3C1(C)O)CCC5C4(CCC6C5(CCC(C6(C)C)OC7C(C(C(CO7)O)OC8C(C(C(C(O8)COS(=O)(=O)O)O)O)O)C)C)C</chem> |  |

|     |                                       |                                                                                                                                                                                                                                                                                                                             |                                                                                                    |  |
|-----|---------------------------------------|-----------------------------------------------------------------------------------------------------------------------------------------------------------------------------------------------------------------------------------------------------------------------------------------------------------------------------|----------------------------------------------------------------------------------------------------|--|
| 8.  | STXBP1_CID:11091080<br>Monnieraside I | [(2 <i>R</i> ,3 <i>R</i> ,4 <i>S</i> ,5 <i>S</i> ,6 <i>R</i> )-4,5-dihydroxy-6-(hydroxymethyl)-2-[2-(4-hydroxyphenyl)ethoxy]oxan-3-yl] 4-hydroxybenzoate                                                                                                                                                                    | <chem>C1=CC(=CC=C1CCOC2C(C(C(C(O2)CO)O)OC(=O)C3=CC=C(C=C3)O)O</chem>                               |  |
| 9.  | STXBP1_CID:9847922<br>Plantainoside B | [(2 <i>R</i> ,3 <i>R</i> ,4 <i>S</i> ,5 <i>S</i> ,6 <i>R</i> )-2-[2-(3,4-dihydroxyphenyl)ethoxy]-4,5-dihydroxy-6-(hydroxymethyl)oxan-3-yl] ( <i>E</i> )-3-(3,4-dihydroxyphenyl)prop-2-enoate                                                                                                                                | <chem>C1=CC(=C(C=C1CCOC2C(C(C(C(O2)CO)O)OC(=O)C=CC3=CC(=C(C=C3)O)O)O)O</chem>                      |  |
| 10. | STXBP1_CID:163188454<br>NA            | [(2 <i>R</i> ,3 <i>R</i> ,4 <i>R</i> ,5 <i>R</i> ,6 <i>R</i> )-4-[(2 <i>S</i> ,3 <i>R</i> ,4 <i>R</i> ,5 <i>R</i> ,6 <i>R</i> )-3,4-dihydroxy-6-(hydroxymethyl)-5-methyloxan-2-yl]oxy-5-hydroxy-6-[2-(3-hydroxy-4-methoxyphenyl)ethoxy]-2-(hydroxymethyl)oxan-3-yl] ( <i>E</i> )-3-(4-hydroxy-3-methoxyphenyl)prop-2-enoate | <chem>CC1C(OC(C(C1O)O)OC2C(C(OC(C2OC(=O)C=CC3=CC(=C(C=C3)O)OC)CO)OCCC4=CC(=C(C=C4)OC)O)O)CO</chem> |  |
