# Supplementary material for: Bio-Computational Evaluation of Compounds of Bacopa Monnieri as a Potential Treatment for Schizophrenia
Source: Molecules. 2022 Oct 19;27(20):7050. doi: 10.3390/molecules27207050 (PMC9611144; doi:10.3390/molecules27207050)
Supplement: Supplementary file 1 [file molecules-27-07050-s001.zip]

Archive with 5 entries (5 files):
- Figure S1.pdf
- Supplementary file S1.pdf
- Table S1.pdf
- Table S2.pdf
- Table S3.pdf
